# Supplementary material for: Pleiotropy facilitates local adaptation to distant optima in common ragweed (Ambrosia artemisiifolia)
Source: PubMed Central journal article supplement (PMC7135370; doi:10.1371/journal.pgen.1008707), 2020-03-25

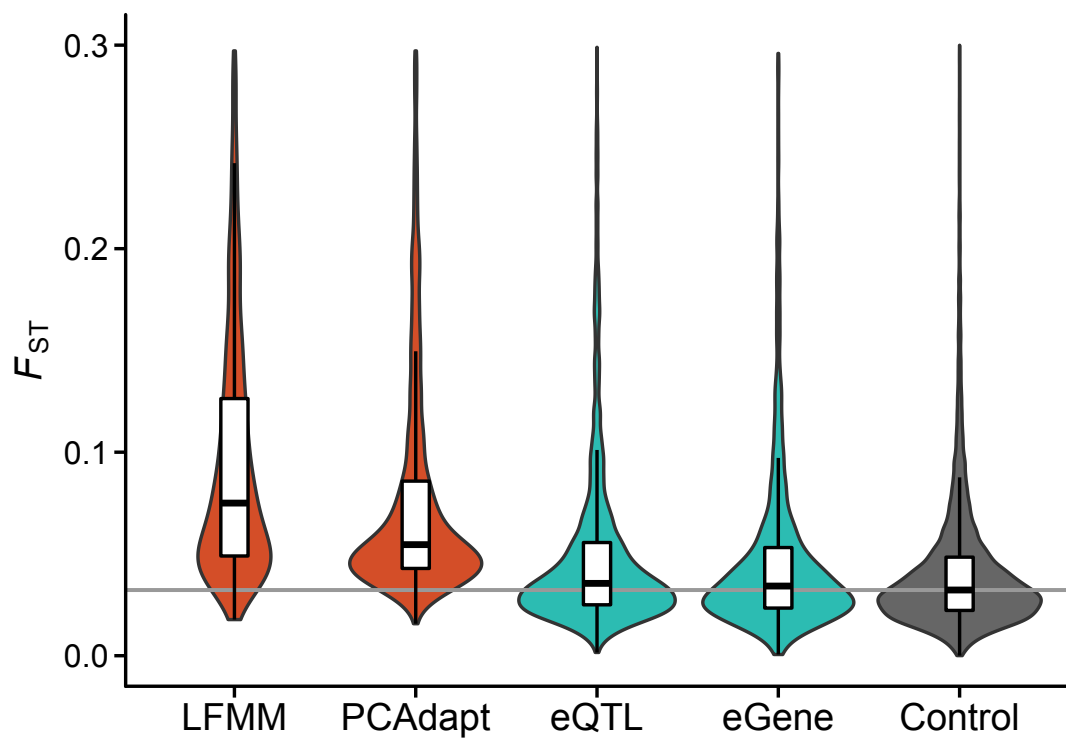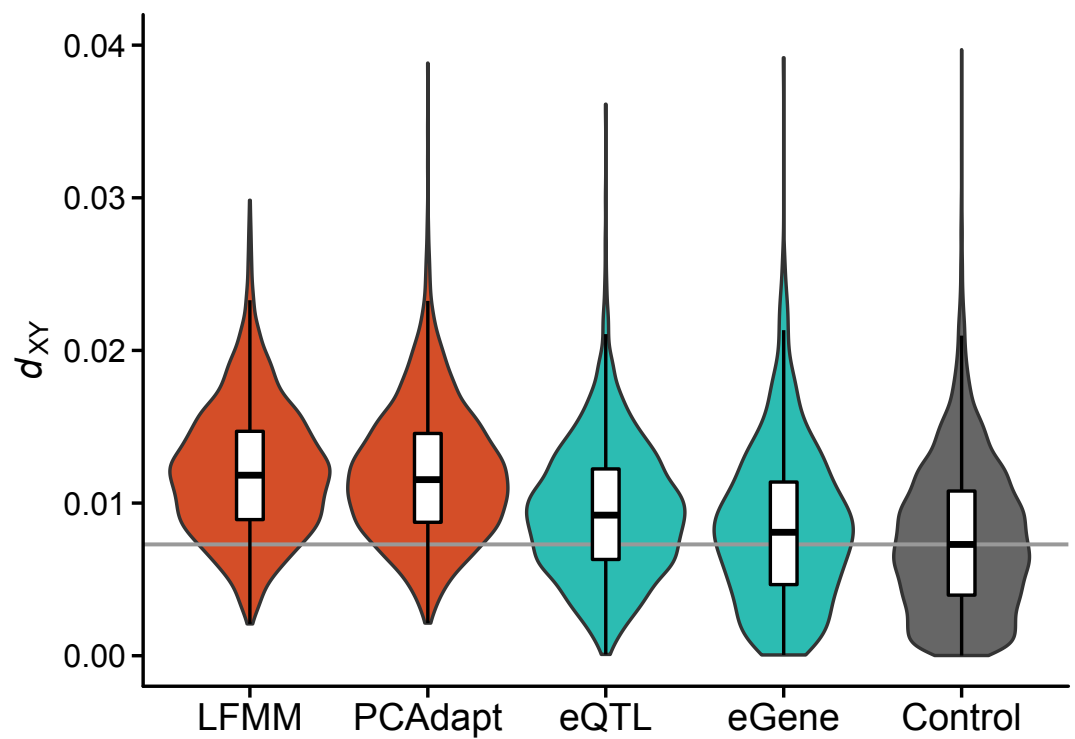

Supplement: pgen.1008707.s004.pdf [file pgen.1008707.s004.pdf]
