# Supplementary material for: Pleiotropy facilitates local adaptation to distant optima in common ragweed (Ambrosia artemisiifolia)
Source: PubMed Central journal article supplement (PMC7135370; doi:10.1371/journal.pgen.1008707), 2020-03-25
Supplement: pgen.1008707.s011.pdf [file pgen.1008707.s011.pdf]

Uncorrected

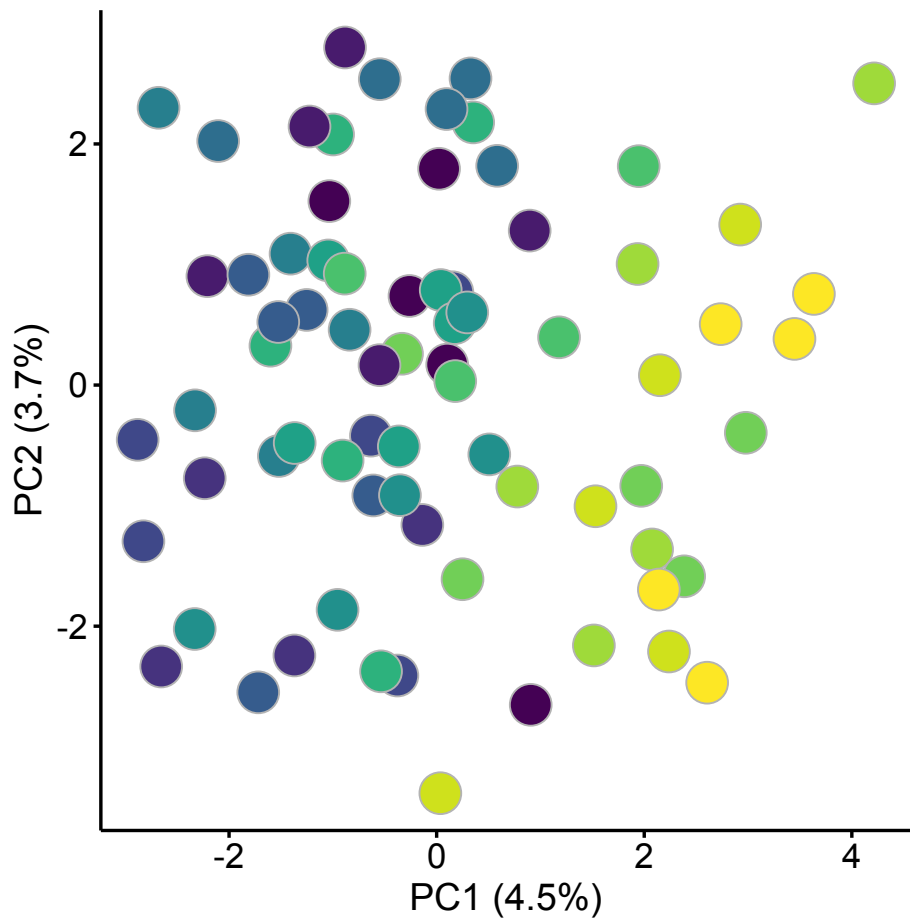

Corrected

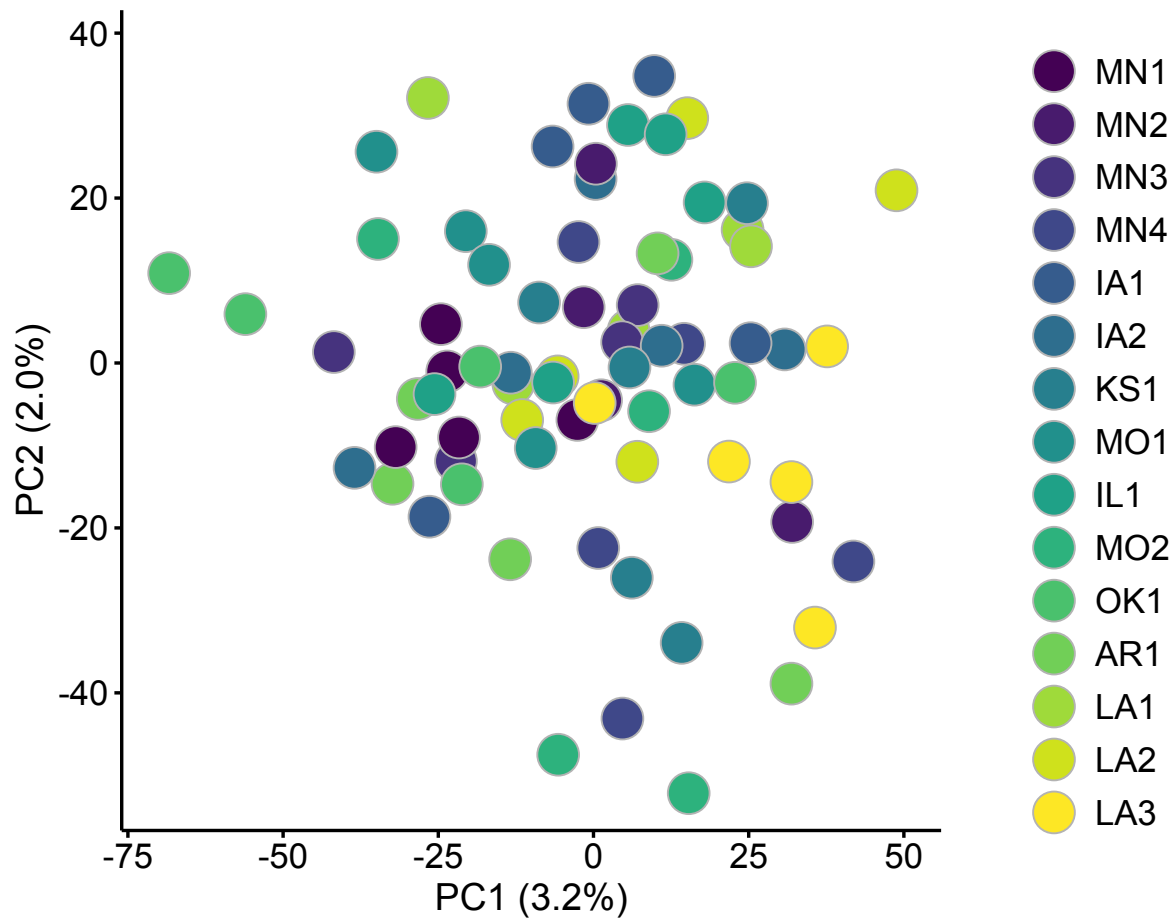

- MN1
- MN2
- MN3
- MN4
- IA1
- IA2
- KS1
- MO1
- IL1
- MO2
- OK1
- AR1
- LA1
- LA2
- LA3
