# Supplementary material for: Pleiotropy facilitates local adaptation to distant optima in common ragweed (Ambrosia artemisiifolia)
Source: PubMed Central journal article supplement (PMC7135370; doi:10.1371/journal.pgen.1008707), 2020-03-25
Supplement: pgen.1008707.s014.pdf [file pgen.1008707.s014.pdf]

|     | MN1  | MN2  | MN3  | MN4  | IA1  | IA2  | KS1  | MO1  | IL1  | MO2  | OK1  | AR1  | LA1  | LA2  |
|-----|------|------|------|------|------|------|------|------|------|------|------|------|------|------|
| MN2 | 0.07 |      |      |      |      |      |      |      |      |      |      |      |      |      |
| MN3 | 0.07 | 0.07 |      |      |      |      |      |      |      |      |      |      |      |      |
| MN4 | 0.07 | 0.07 | 0.07 |      |      |      |      |      |      |      |      |      |      |      |
| IA1 | 0.06 | 0.07 | 0.06 | 0.07 |      |      |      |      |      |      |      |      |      |      |
| IA2 | 0.07 | 0.07 | 0.08 | 0.07 | 0.07 |      |      |      |      |      |      |      |      |      |
| KS1 | 0.08 | 0.08 | 0.08 | 0.08 | 0.07 | 0.06 |      |      |      |      |      |      |      |      |
| MO1 | 0.06 | 0.07 | 0.07 | 0.07 | 0.06 | 0.07 | 0.08 |      |      |      |      |      |      |      |
| IL1 | 0.07 | 0.07 | 0.07 | 0.07 | 0.06 | 0.07 | 0.08 | 0.06 |      |      |      |      |      |      |
| MO2 | 0.06 | 0.07 | 0.06 | 0.07 | 0.06 | 0.07 | 0.07 | 0.06 | 0.06 |      |      |      |      |      |
| OK1 | 0.07 | 0.08 | 0.08 | 0.08 | 0.07 | 0.07 | 0.07 | 0.07 | 0.08 | 0.07 |      |      |      |      |
| AR1 | 0.09 | 0.08 | 0.08 | 0.08 | 0.07 | 0.08 | 0.09 | 0.07 | 0.07 | 0.06 | 0.08 |      |      |      |
| LA1 | 0.09 | 0.11 | 0.10 | 0.10 | 0.09 | 0.11 | 0.11 | 0.09 | 0.09 | 0.08 | 0.10 | 0.08 |      |      |
| LA2 | 0.09 | 0.10 | 0.09 | 0.09 | 0.09 | 0.10 | 0.11 | 0.08 | 0.09 | 0.08 | 0.10 | 0.08 | 0.08 |      |
| LA3 | 0.11 | 0.12 | 0.12 | 0.12 | 0.11 | 0.13 | 0.13 | 0.11 | 0.11 | 0.10 | 0.12 | 0.10 | 0.11 | 0.09 |
