# Supplementary material for: Pleiotropy facilitates local adaptation to distant optima in common ragweed (Ambrosia artemisiifolia)
Source: PubMed Central journal article supplement (PMC7135370; doi:10.1371/journal.pgen.1008707), 2020-03-25
Supplement: pgen.1008707.s015.pdf [file pgen.1008707.s015.pdf]

|     | $\theta_\pi$ | $\theta_w$ | Tajima's $D$ |
|-----|--------------|------------|--------------|
| MN1 | 0.019        | 0.021      | -0.732       |
| MN2 | 0.019        | 0.020      | -0.599       |
| MN3 | 0.019        | 0.020      | -0.752       |
| MN4 | 0.019        | 0.021      | -0.711       |
| IA1 | 0.019        | 0.021      | -0.738       |
| IA2 | 0.019        | 0.021      | -0.734       |
| KS1 | 0.019        | 0.021      | -0.649       |
| MO1 | 0.019        | 0.021      | -0.736       |
| IL1 | 0.019        | 0.021      | -0.701       |
| MO2 | 0.019        | 0.021      | -0.757       |
| OK1 | 0.019        | 0.021      | -0.723       |
| AR1 | 0.019        | 0.020      | -0.613       |
| LA1 | 0.018        | 0.019      | -0.454       |
| LA2 | 0.018        | 0.020      | -0.574       |
| LA3 | 0.017        | 0.018      | -0.302       |
