# Supplementary material for: Pleiotropy facilitates local adaptation to distant optima in common ragweed (Ambrosia artemisiifolia)
Source: PubMed Central journal article supplement (PMC7135370; doi:10.1371/journal.pgen.1008707), 2020-03-25
Supplement: pgen.1008707.s016.pdf [file pgen.1008707.s016.pdf]

|       | PC1  | PC2  | PC3  | PC4  | PC5  | PC6  | PC7  | PC8  | PC9  | PC10 |
|-------|------|------|------|------|------|------|------|------|------|------|
| BIO1  | 0.06 | 0.01 | 0.01 | 0.04 | 0.05 | 0    | 0.03 | 0.01 | 0    | 0.02 |
| BIO2  | 0.01 | 0.2  | 0.06 | 0.11 | 0.12 | 0.1  | 0.02 | 0    | 0    | 0.05 |
| BIO3  | 0.06 | 0.03 | 0    | 0.05 | 0.06 | 0.08 | 0.08 | 0.03 | 0.02 | 0.09 |
| BIO4  | 0.06 | 0    | 0.01 | 0.01 | 0.02 | 0.06 | 0.06 | 0.07 | 0.05 | 0.05 |
| BIO5  | 0.05 | 0.08 | 0.05 | 0.09 | 0.09 | 0.02 | 0.04 | 0.1  | 0.01 | 0.03 |
| BIO6  | 0.06 | 0    | 0    | 0.03 | 0.04 | 0.02 | 0.04 | 0.01 | 0.03 | 0.01 |
| BIO7  | 0.06 | 0.03 | 0.02 | 0    | 0.02 | 0.04 | 0.08 | 0.05 | 0.05 | 0.02 |
| BIO8  | 0.03 | 0.15 | 0.11 | 0.2  | 0.07 | 0.06 | 0.05 | 0.04 | 0.06 | 0    |
| BIO9  | 0.06 | 0.05 | 0.04 | 0.01 | 0.09 | 0.22 | 0.02 | 0.01 | 0.16 | 0.03 |
| BIO10 | 0.06 | 0.03 | 0.03 | 0.07 | 0.09 | 0.06 | 0.04 | 0.1  | 0.03 | 0.03 |
| BIO11 | 0.06 | 0.01 | 0    | 0.03 | 0.04 | 0.02 | 0.04 | 0.01 | 0.02 | 0.01 |
| BIO12 | 0.06 | 0.01 | 0    | 0.04 | 0.03 | 0.03 | 0.01 | 0.05 | 0.06 | 0.08 |
| BIO13 | 0.05 | 0.05 | 0.15 | 0.02 | 0.01 | 0.03 | 0.14 | 0.17 | 0.02 | 0.08 |
| BIO14 | 0.06 | 0.06 | 0.06 | 0.07 | 0.06 | 0.03 | 0.09 | 0.06 | 0.06 | 0.06 |
| BIO15 | 0.05 | 0.07 | 0.16 | 0.04 | 0.04 | 0.04 | 0.12 | 0.04 | 0.04 | 0.11 |
| BIO16 | 0.06 | 0.05 | 0.12 | 0.05 | 0.04 | 0.04 | 0.03 | 0.03 | 0.18 | 0.12 |
| BIO17 | 0.06 | 0.03 | 0.07 | 0.06 | 0.02 | 0.01 | 0.02 | 0.02 | 0.07 | 0.07 |
| BIO18 | 0.04 | 0.14 | 0.04 | 0.02 | 0.07 | 0.13 | 0.04 | 0.18 | 0.12 | 0.02 |
| BIO19 | 0.06 | 0    | 0.05 | 0.06 | 0.04 | 0.02 | 0.06 | 0.01 | 0.02 | 0.1  |
| PVE   | 0.80 | 0.12 | 0.03 | 0.03 | 0.01 | 0.01 | 0    | 0    | 0    | 0    |

For explanations of the BIO-variables, see <https://www.worldclim.org/bioclim>
